# Supplementary material for: Positive natural selection of N6-methyladenosine on the RNAs of processed pseudogenes
Source: PubMed Central journal article supplement (PMC8201931; doi:10.1186/s13059-021-02402-2), 2021-06-13

Additional file 1 : Fig. S1 to S12 for  
**Positive natural selection of N6-methyladenosine on the  
RNAs of processed pseudogenes**

**Additional Fig. S1. The optimization of conventional HISAT2 mapping procedure. a, b, c** Scatter plot comparing the aligned counts between the conventional HISAT2 mapping procedure (HH) and the new HISAT2 mapping procedure (HHS) for whole genes **a**, pseudogenes **b** and cognate coding genes **c**, respectively. **d, e** UCSC genome browser tracks of m<sup>6</sup>A-LAIC-seq input data between HH and HHS showing representative examples of pseudogenes and their cognate protein-coding genes. Read-coverage tracks of input fractions of m<sup>6</sup>A-LAIC-seq shown along with re-assignment of reads (red for HHS and cyan for HH; re-assigned reads between HH and HHS are indicated by color). Plots showing the track and re-assignment of reads between HH and HHS for protein-coding gene RPS7 and corresponding pseudogene RPS7P1 **d** and protein-coding gene PPP1R14B and corresponding pseudogene PPP1R14BP3 **e**, respectively.

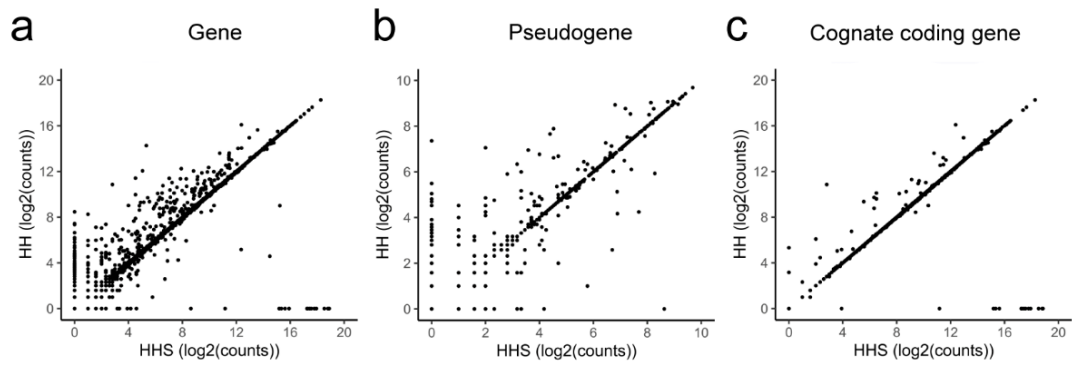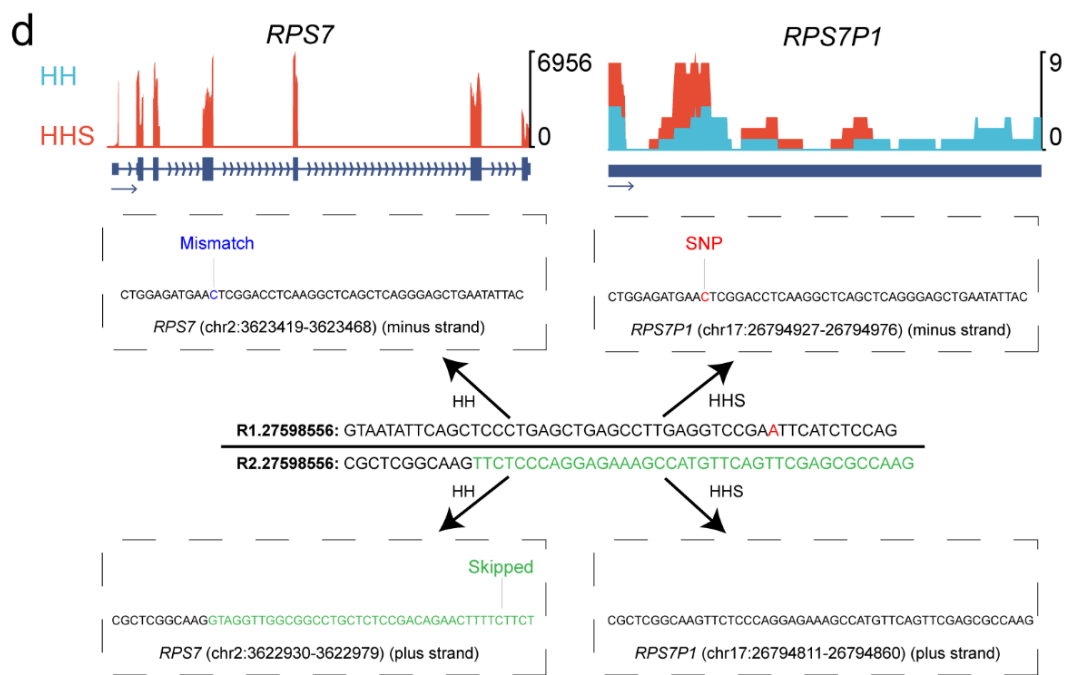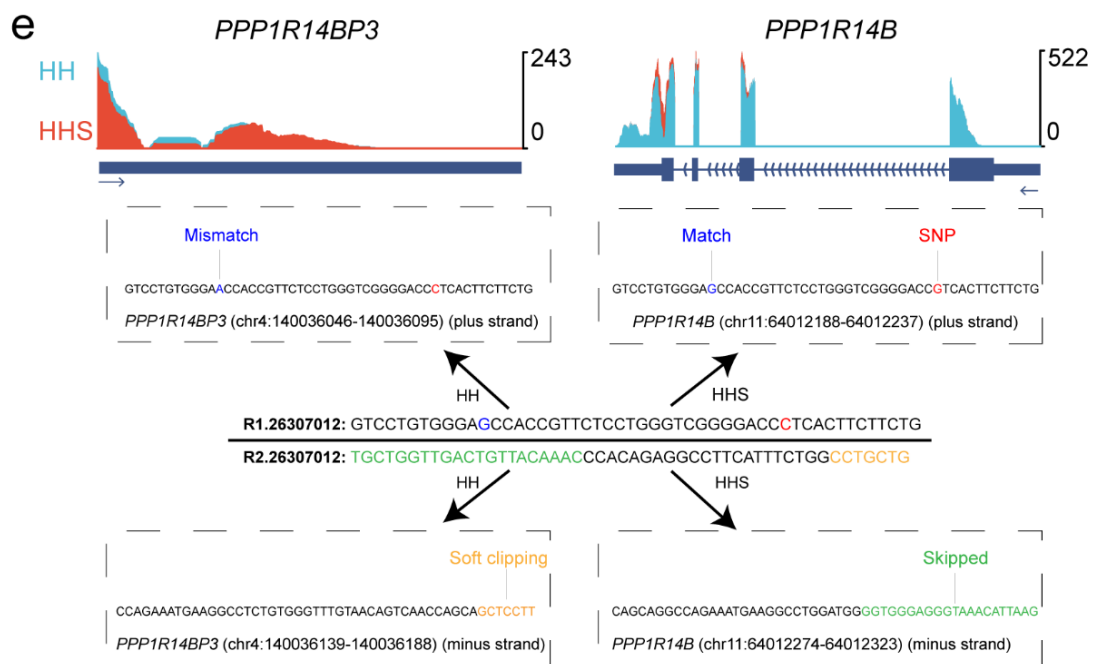

**Additional Fig. S2. Comparisons of m<sup>6</sup>A between pseudogenes and their cognate protein-coding genes in GM12878 and H1 cell line.** **a** The GO enrichment of the cognate protein-coding genes of pseudogenes with valid m<sup>6</sup>A levels in GM12878 cell line. **b** GO enrichment plot showing the GO enrichment of the cognate protein-coding genes of pseudogenes with valid m<sup>6</sup>A levels in H1 cell line. **c** Box plot comparing the m<sup>6</sup>A levels between pseudogenes and their cognate protein-coding genes for multi-exon pseudogenes and intronless (single-exon) pseudogenes respectively in GM12878 cell line. **d** Scatter plot comparing the m<sup>6</sup>A levels between pseudogenes and their cognate protein-coding genes for multi-exon pseudogenes and intronless (single-exon) pseudogenes respectively in GM12878 cell line. **e** Box plot comparing the m<sup>6</sup>A levels between pseudogenes and their cognate protein-coding genes for multi-exon pseudogenes and intronless (single-exon) pseudogenes respectively in H1 cell line. **f** Scatter plot comparing the m<sup>6</sup>A levels between pseudogenes and their cognate protein-coding genes for multi-exon pseudogenes and intronless (single-exon) pseudogenes respectively in H1 cell line.

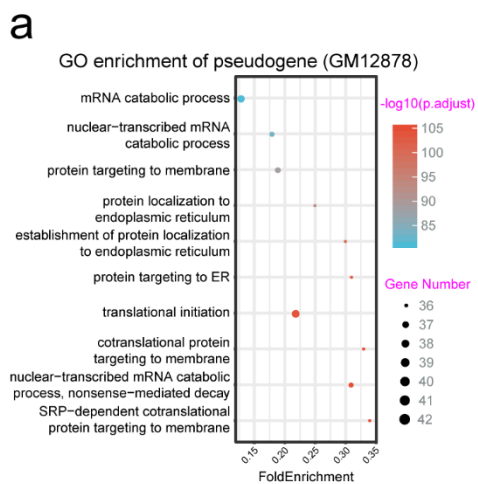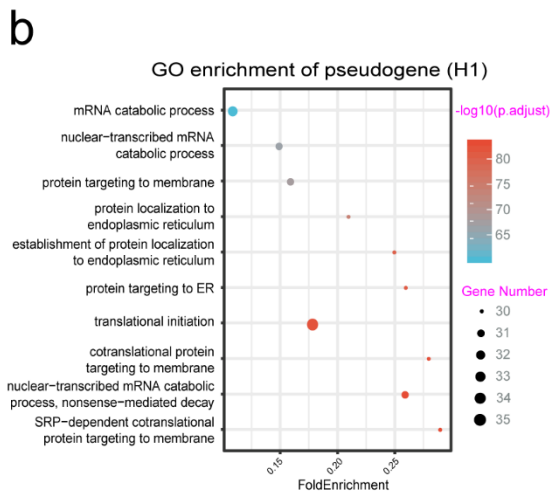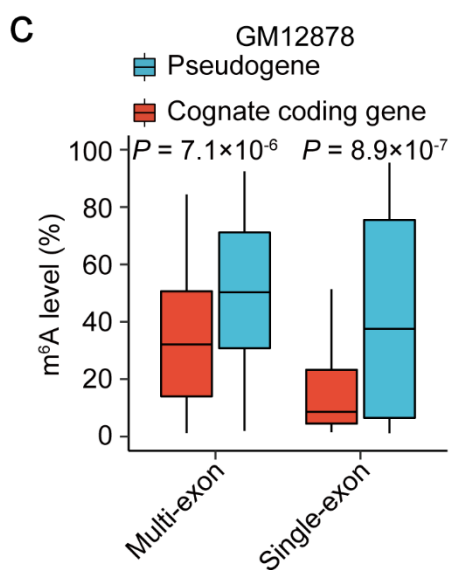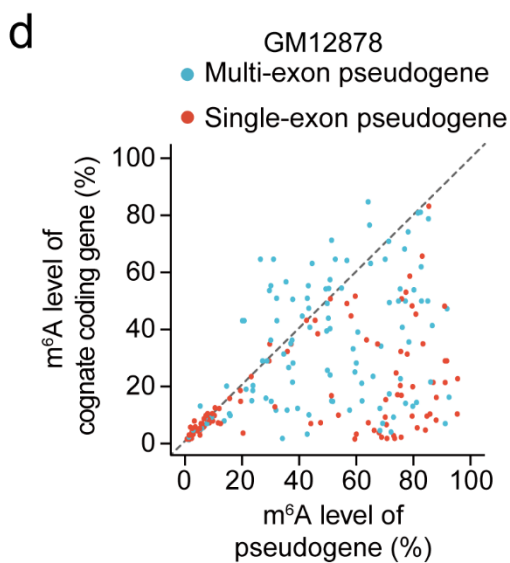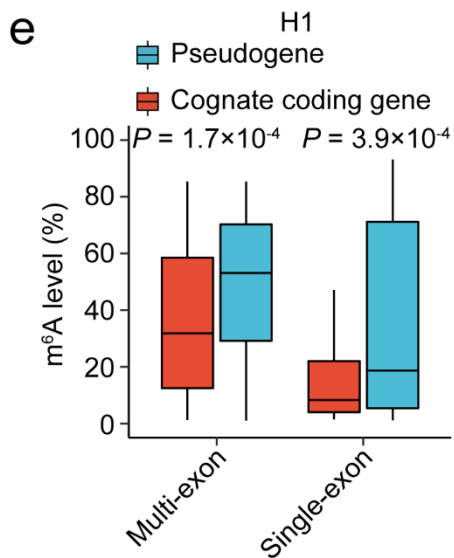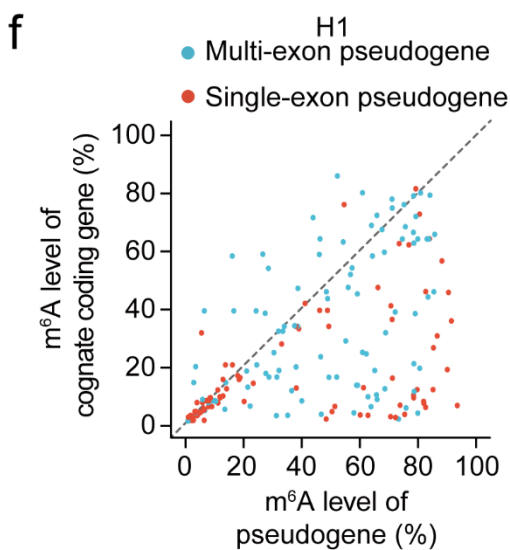

**Additional Fig. S3. Comparisons of m<sup>6</sup>A between pseudogenes and their cognate protein-coding genes in H1 cell line.** **a** Box plot comparing the m<sup>6</sup>A levels among different biotypes. **b** Box plot comparing the m<sup>6</sup>A levels between pseudogenes and their cognate protein-coding genes for processed pseudogenes and unprocessed pseudogenes respectively. **c** Scatter plot comparing the m<sup>6</sup>A levels between pseudogenes and their cognate protein-coding genes for processed pseudogenes and unprocessed pseudogenes respectively. **d** UCSC genome browser tracks of m<sup>6</sup>A-seq and m<sup>6</sup>A-LAIC-seq data showing representative examples of pseudogenes and their cognate protein-coding genes. Read-coverage tracks of input, m<sup>6</sup>A-negative, and m<sup>6</sup>A-positive fractions of m<sup>6</sup>A-LAIC-seq shown along with overlay tracks of m<sup>6</sup>A-seq (red for RIP and cyan for input; predicted m<sup>6</sup>A sites in m<sup>6</sup>A peaks are indicated by arrows). Read coverage (y-axis) of m<sup>6</sup>A negative and m<sup>6</sup>A positive are normalized as previously described to reflect the calculated m<sup>6</sup>A levels (i.e., equal signals in m<sup>6</sup>A positive (eluate) versus m<sup>6</sup>A negative (supernatant) indicate m<sup>6</sup>A levels of 50%), while input and m<sup>6</sup>A-seq tracks are shown for optimal viewing. **e** Plot of sequence alignment showing the pseudogenes-specific m<sup>6</sup>A motifs in the pseudogenes *DSTNP2* and *NAPIL4P1*.



**Additional Fig. S4. Correlation of the m<sup>6</sup>A of processed pseudogenes in GM12878 cells with the gene features of their cognate protein-coding genes. a-d** Box plots comparing the m<sup>6</sup>A levels among the processed pseudogenes with different ranges of 5'UTR length **a**, CDS length **b**, 3'UTR length **c**, and GC content **d** of their cognate coding genes.

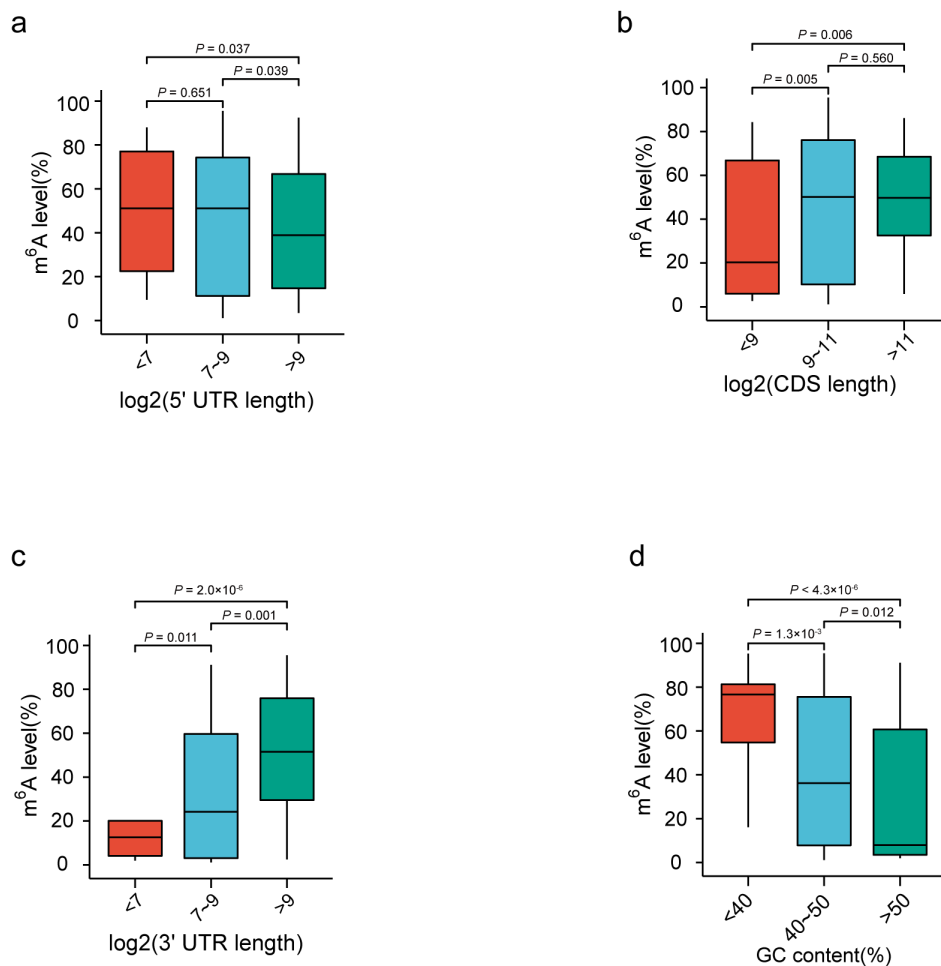



**Additional Fig. S5. Positive natural selection of the m<sup>6</sup>A on pseudogenes in H1 cell line.** **a** The distributions of the ages of m<sup>6</sup>A sites (left) and control non-m<sup>6</sup>A DRACH sites (right). The age of each site was based on the most distantly related species in which the site was conserved. **b** Box plot comparing the peak intensities between m<sup>6</sup>A sites with high (top 25%, strong constraint) and low (bottom 25%, weak constraint) rejected substitution scores. **c** Barplot showing the percentages of DRACH motifs within m<sup>6</sup>A peaks of H1 cells for DRACH motif of different ages. **d** Box plot comparing the peak intensities of m<sup>6</sup>A sites with different ages of pseudogenes. **e, f** Scatter plots showing the correlation of the sequence divergences between pseudogenes and their cognate protein-coding genes with the m<sup>6</sup>A levels of pseudogenes for processed **e** and unprocessed **f** pseudogenes respectively. **g, h** Box plot comparing m<sup>6</sup>A level of pseudogenes with different ranges of dN/dS ratios of their cognate coding genes for processed **g** and unprocessed **h** pseudogenes respectively. **i-l** Box plots comparing the m<sup>6</sup>A levels among the processed pseudogenes with different ranges of 5'UTR length **i**, CDS length **j**, 3'UTR length **k**, and GC content **l** of their cognate coding genes.

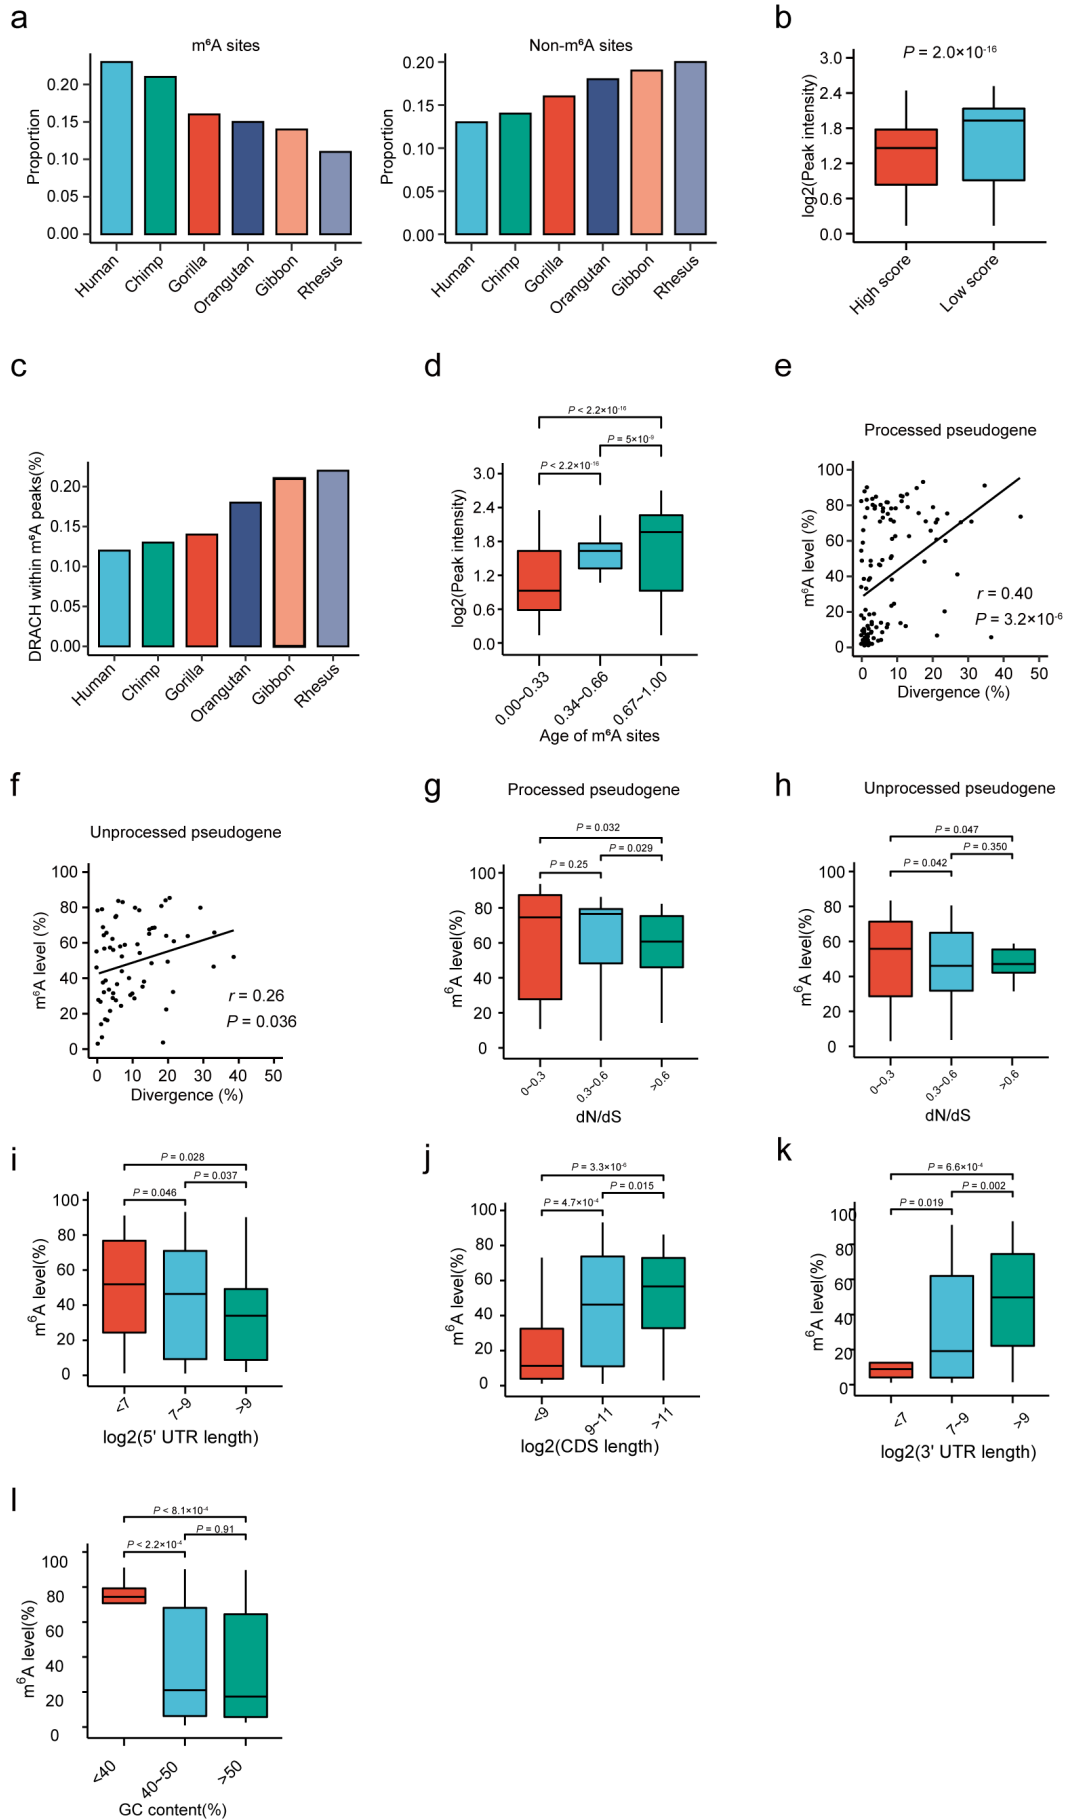

**Additional Fig. S6. m<sup>6</sup>A facilitates the cytosolic degradation of cognate protein-coding genes of processed pseudogenes in GM12878 cell line.** **a, b** Plot of cumulative fraction of expression **a** and nuclear index **b** for processed pseudogene with high (m<sup>6</sup>A level  $\geq 0.6$ ), medium ( $0.6 > \text{m}^6\text{A level} \geq 0.3$ ), and low (m<sup>6</sup>A level  $< 0.3$ ) m<sup>6</sup>A levels respectively in control cells. Two-tailed Wilcoxon *P* values are indicated at the bottom right corner. **c** Plot of cumulative fraction of expression of cognate protein-coding genes for unprocessed pseudogenes with high (m<sup>6</sup>A level  $\geq 0.6$ ), medium ( $0.6 > \text{m}^6\text{A level} \geq 0.3$ ), and low (m<sup>6</sup>A level  $< 0.3$ ) m<sup>6</sup>A levels respectively. Two-tailed Wilcoxon *P* values are indicated at the top left corner and bottom right corner, respectively. **d, e** Plot of cumulative fraction of nuclear indexes (ratio of expression between nucleus and cytosol) of cognate protein-coding genes for processed **d** and unprocessed **e** pseudogene with high, medium, and low m<sup>6</sup>A levels respectively. Two-tailed Wilcoxon *P* values are indicated at the bottom right corner.

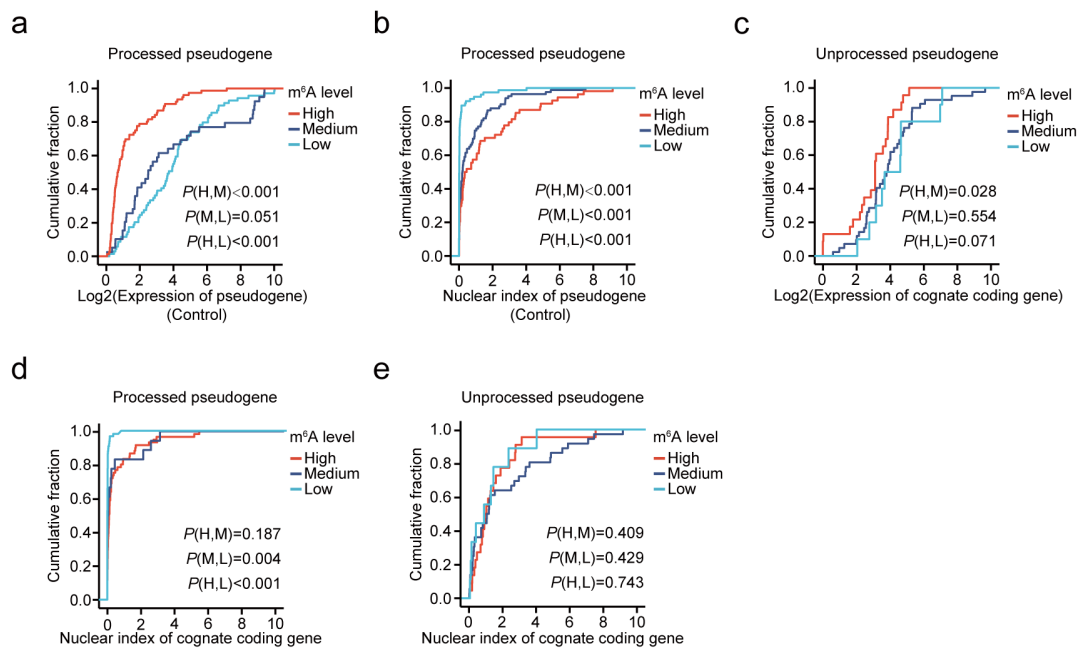

**Additional Fig. S7. m<sup>6</sup>A facilitates the cytosolic degradation of processed pseudogenes in H1 cell line.** **a, b** Plot of cumulative fraction of expression for processed **a** and unprocessed **b** pseudogene with high (m<sup>6</sup>A level  $\geq 0.6$ ), medium ( $0.6 > \text{m}^6\text{A level} \geq 0.3$ ), and low (m<sup>6</sup>A level  $< 0.3$ ) m<sup>6</sup>A levels respectively. Two-tailed Wilcoxon *P* values are indicated at the bottom right corner. **c, d** Plot of cumulative fraction of nuclear indexes (ratio of expression between nucleus and cytosol) for processed **c** and unprocessed **d** pseudogene with high, medium, and low m<sup>6</sup>A levels respectively. Two-tailed Wilcoxon *P* values are indicated at the bottom right corner. **e, f** Plot of cumulative fraction of cytosolic **e** and nuclear **f** gene expression for processed pseudogene with high, medium, and low m<sup>6</sup>A levels respectively. Two-tailed Wilcoxon *P* values are indicated at the bottom right corner.

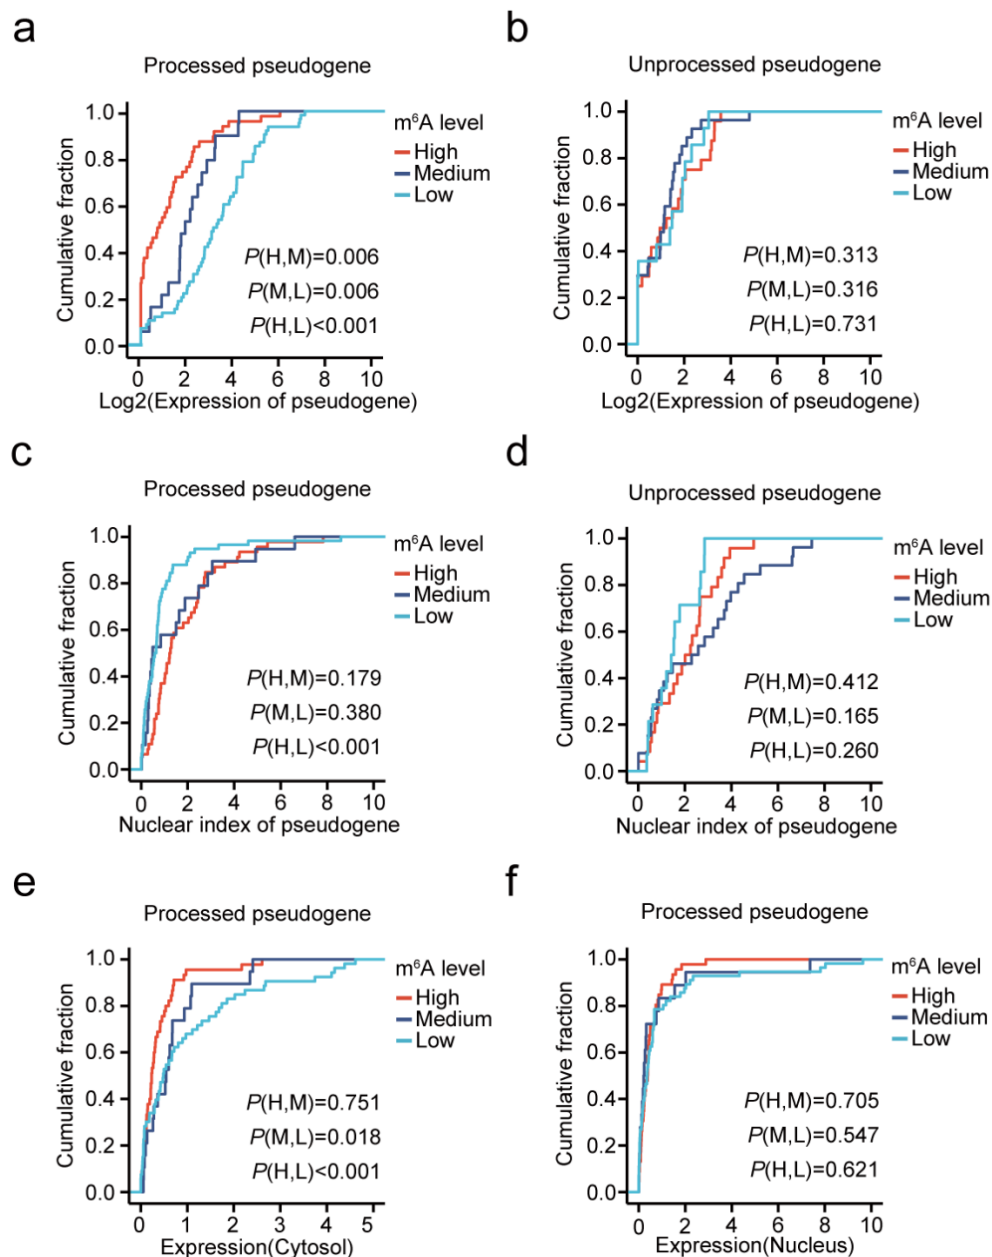

**Additional Fig. S8. m<sup>6</sup>A facilitates the cytosolic degradation of cognate protein-coding genes of processed pseudogenes in H1 cell line.** **a, b** Plot of cumulative fraction of expression of cognate protein-coding genes for processed **a** and unprocessed **b** pseudogene with high (m<sup>6</sup>A level  $\geq 0.6$ ), medium ( $0.6 > \text{m}^6\text{A level} \geq 0.3$ ), and low (m<sup>6</sup>A level  $< 0.3$ ) m<sup>6</sup>A levels respectively. Two-tailed Wilcoxon *P* values are indicated at the top left corner and bottom right corner, respectively. **c, d** Plot of cumulative fraction of nuclear indexes (ratio of expression between nucleus and cytosol) of cognate protein-coding genes for processed **c** and unprocessed **d** pseudogene with high, medium, and low m<sup>6</sup>A levels respectively. Two-tailed Wilcoxon *P* values are indicated at the bottom right corner.

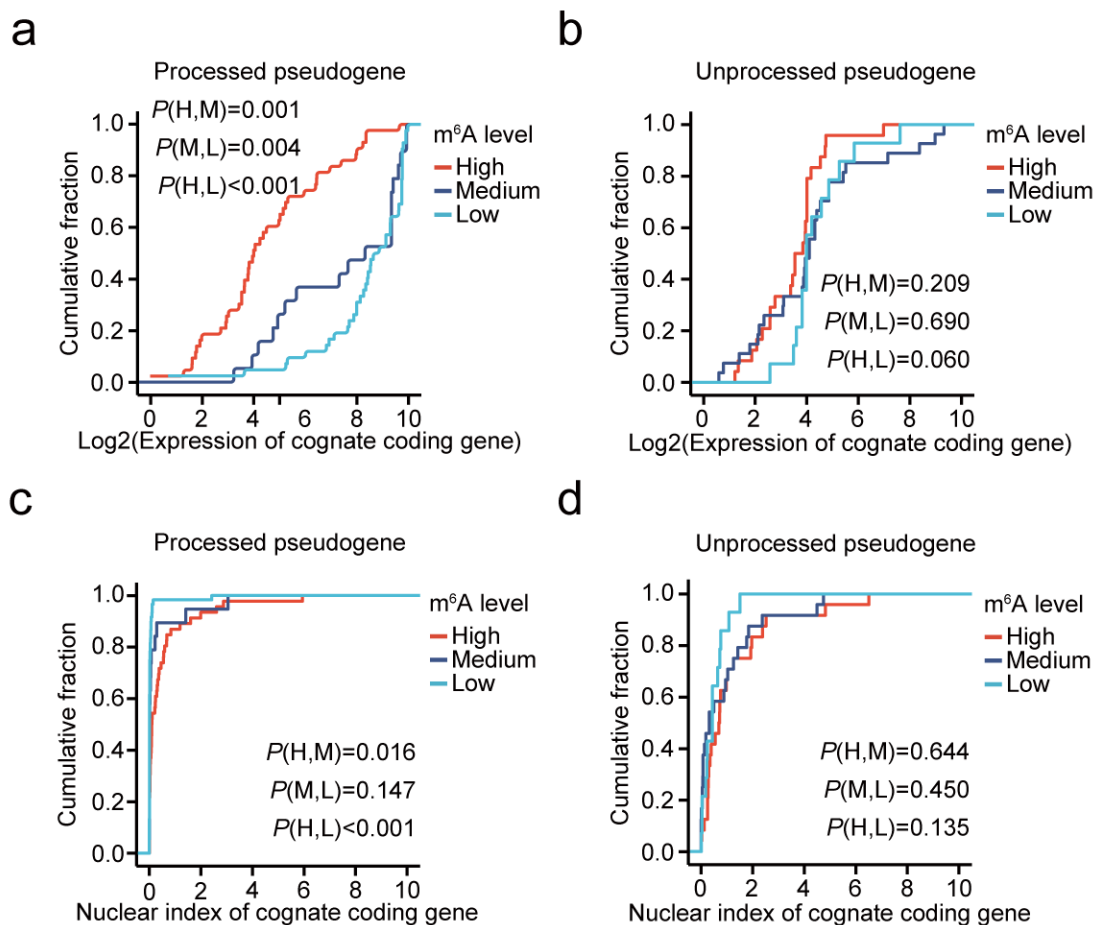

**Additional Fig. S9 The gene regulatory network and primer design principles of processed pseudogenes and cognate protein-coding genes. a** The processed pseudogene *DSTNP1*-miRNA-cognate protein-coding gene *DSTN* regulatory network. Pink round rectangles represented pseudogene *DSTNP2*, which is located at the left of the networks. Tomato ellipses represented binding miRNAs, which are located at the center of the networks. And blue round rectangles stand for cognate protein-coding gene *DSTN*, which is located at the right of the networks. **b** No mutations were shown in miR362-5p and miR3681-5p binding region on wild-type and m<sup>6</sup>A site-mutated *DSTNP2* and *NAP1L4P2*, respectively. **c** The qPCR primer designs for *DSTN*, *DSTNP2*, *NAP1L4*, and *NAP1L4P2*, respectively.

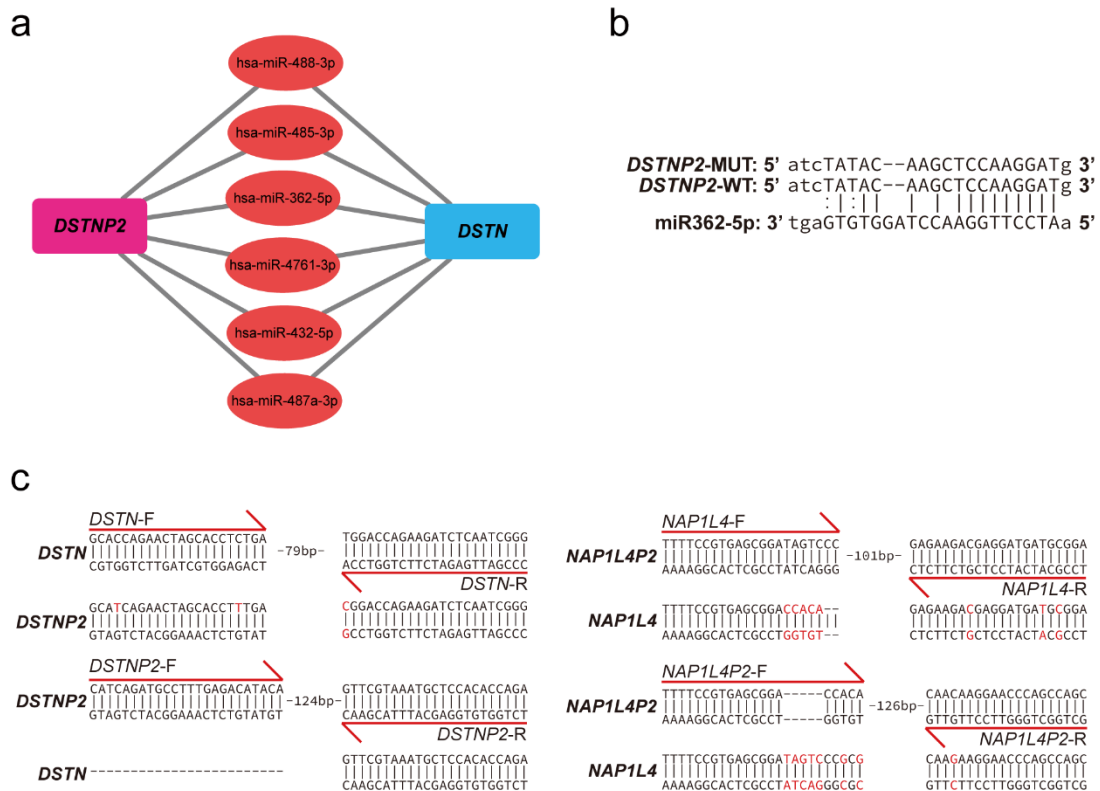

**Additional Fig. S10. The uncropped western blot .** **a** The uncropped western blot comparing the protein levels of *DSTN* in control and *DSTNP2* knockdown cells. **b** The uncropped western blot comparing the protein levels of *DSTN* upon overexpression of wild type *DSTNP2* versus m<sup>6</sup>A site-mutated *DSTNP2*. **c** The uncropped western blot showing the protein level of *DSTN* upon overexpression of wild type *DSTNP2* versus m<sup>6</sup>A site-mutated *DSTNP2* after adding control inhibitor and miR362-5p inhibitor respectively.

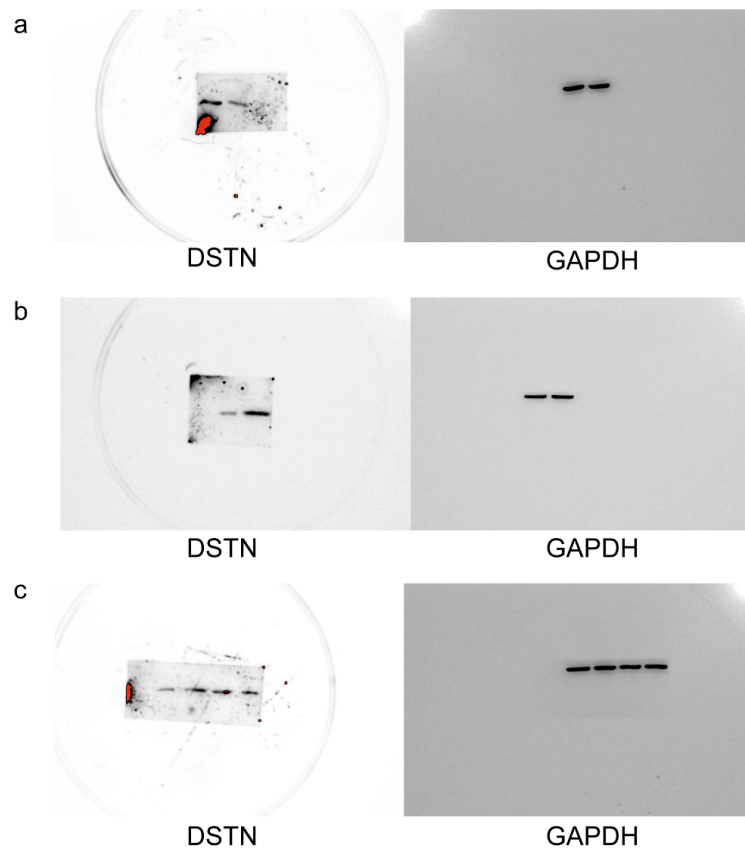

**Additional Fig. S11. Experimental validation of m<sup>6</sup>A on processed pseudogene *NAP1L4P1* affects the expression of *NAP1L4* in GM12878 cell line.** **a** The relative expression of *DSTNP2* and *NAP1L4P1* upon vector, overexpression wild type pseudogenes and overexpression m<sup>6</sup>A site-mutated pseudogenes, respectively. **b** The relative expression of *NAP1L4* upon overexpression empty vector and wild type *NAP1L4P1* respectively. Error bars represent standard errors. \*\*\* P<0.001 (two-tailed t test). **c** Bar plot comparing the relative expression of total, cytoplasmic and nuclear *NAP1L4* respectively upon overexpression of wild type versus m<sup>6</sup>A sites-mutated *NAP1L4P1*. **d, e** The relative expression of *NAP1L4P1* **d** and *NAP1L4* **e upon overexpression of wild type *NAP1L4P1* versus m<sup>6</sup>A site-mutated *NAP1L4P1* at different time points after transcription inhibition. Error bars represent standard errors. \*\* P<0.01; \*\*\* P<0.001 (two-tailed t test).**

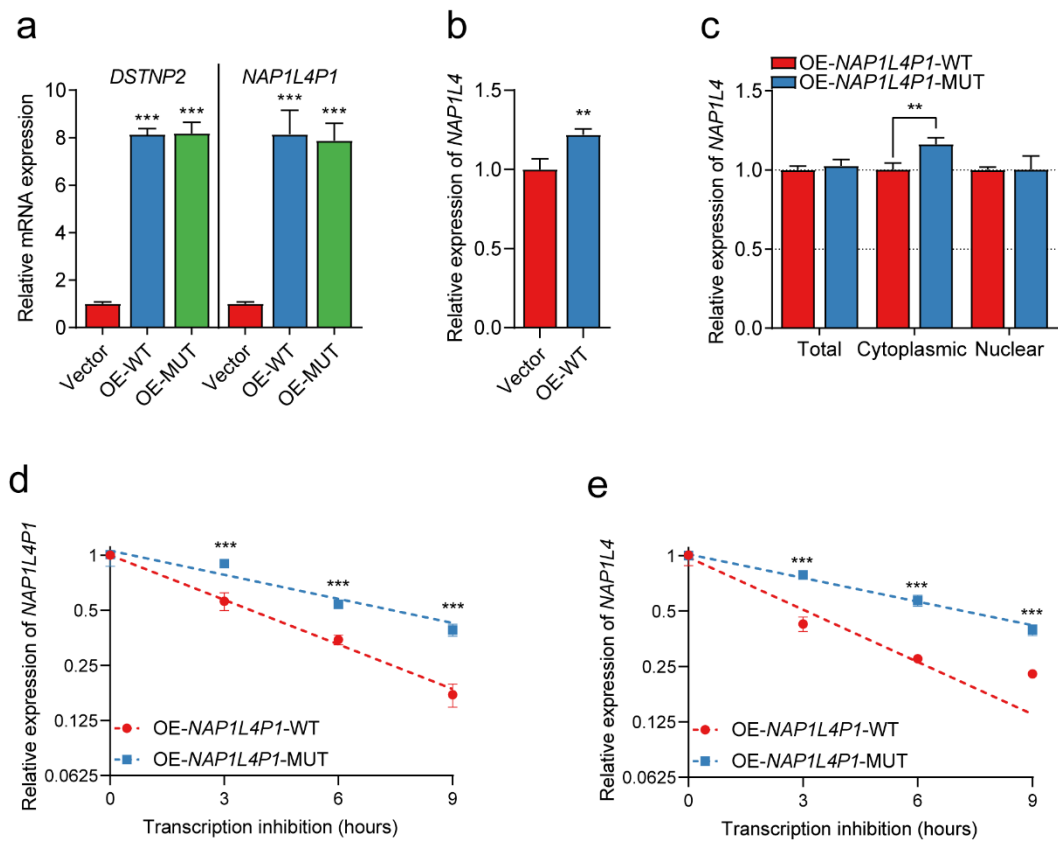



**Additional Fig. S12. Correlation between m<sup>6</sup>A levels and exon numbers of coding genes.** **a** Boxplot comparing the m<sup>6</sup>A levels between spliced coding genes and intronless coding genes in GM12878 cells. **b** Boxplot comparing the m<sup>6</sup>A levels of coding genes with different number of exons in GM12878 cells. **c** Boxplot comparing the m<sup>6</sup>A levels between spliced coding genes and intronless coding genes in H1 cells. **d** Boxplot comparing the m<sup>6</sup>A levels of coding genes with different number of exons in H1 cells.

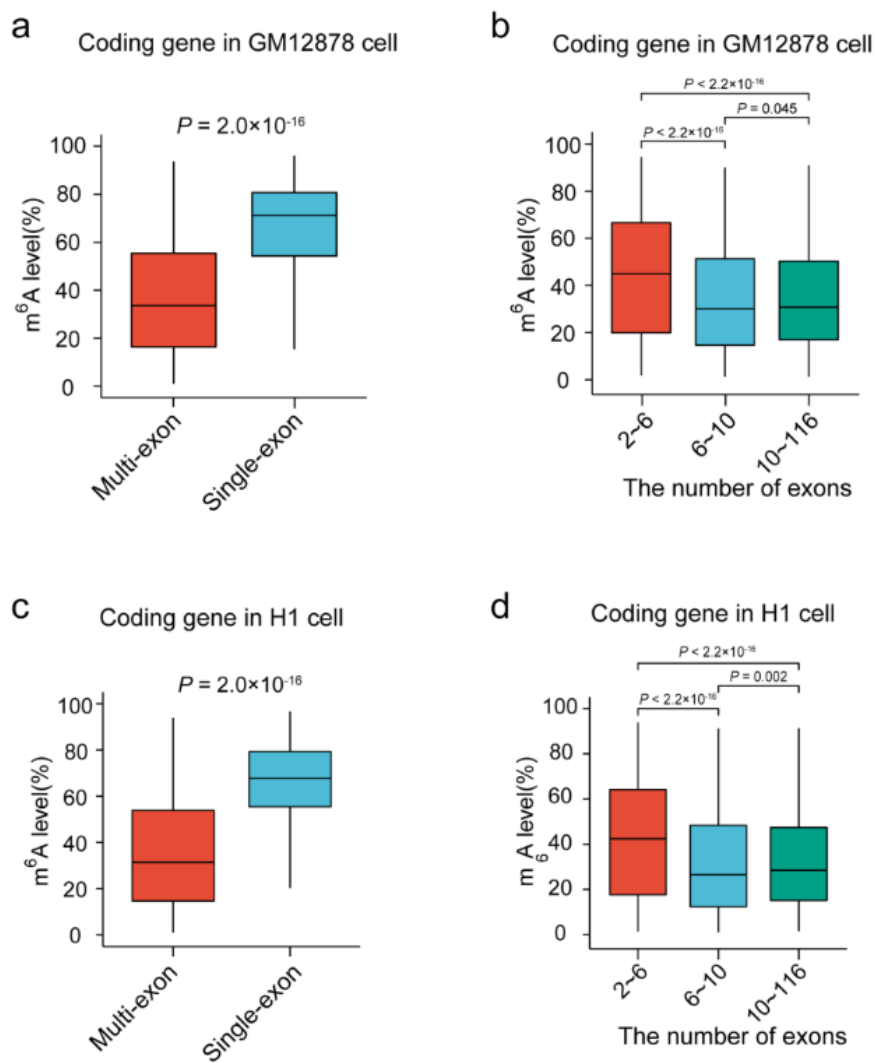

Supplement: 13059_2021_2402_MOESM1_ESM.pdf [file 13059_2021_2402_MOESM1_ESM.pdf]
